# Supplementary material for: Landsat, MODIS, and VIIRS snow cover mapping algorithm performance as validated by airborne lidar datasets
Source: Copernicus journal article supplement (doi:10.5194/tc-17-567-2023), 2023-02-08
Supplement: Supplementary file 1 [file tc-17-567-2023-supplement.zip]

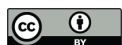

*Supplement of*

## **Landsat, MODIS, and VIIRS snow cover mapping algorithm performance as validated by airborne lidar datasets**

**Timbo Stilling et al.**

*Correspondence to:* Timbo Stilling (tcs@ucsb.edu)

- tc-17-567-2023-supplement-title-page.pdf
- valKeyL8.csv
- valKeyMODIS.csv
- valKeyUSGS.csv

The copyright of individual parts of the supplement might differ from the article licence.
